# Supplementary material for: Statin use and exacerbations in individuals with chronic obstructive pulmonary disease
Source: HighWire-hosted journal article supplement (doi:10.1136/thoraxjnl-2014-205795), 2014-10-27

## Supplementary Figures

**Suppl Figure 1: FLOW-DIAGRAM.** Flow-diagram of the selection of cases and controls among individuals with COPD in the Copenhagen General Population Study.

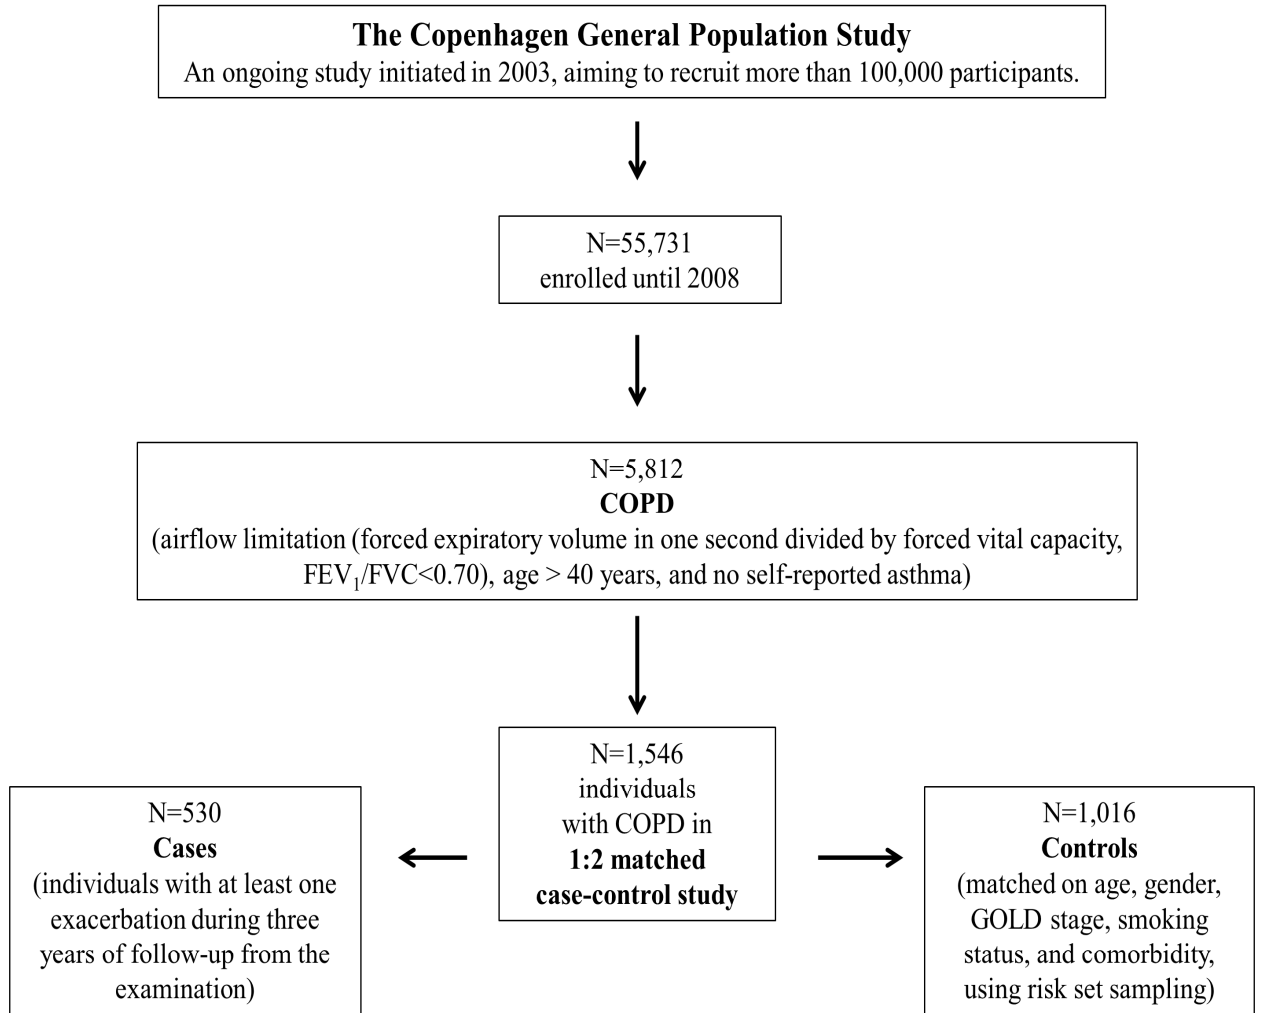

**Suppl Figure 2: STATINS AND EXACERBATIONS.** Variables included as possible confounders in the multivariable conditional logistic regression analysis in the case-control study, and their associated odds of exacerbations. Abbreviations: GP=general practitioner; ICS/LABA= fixed-dose combinations of inhaled corticosteroids with long-acting beta<sub>2</sub>-agonists; LABA=long-acting beta<sub>2</sub>-agonists; LAMA=long-acting anti-cholinergics.

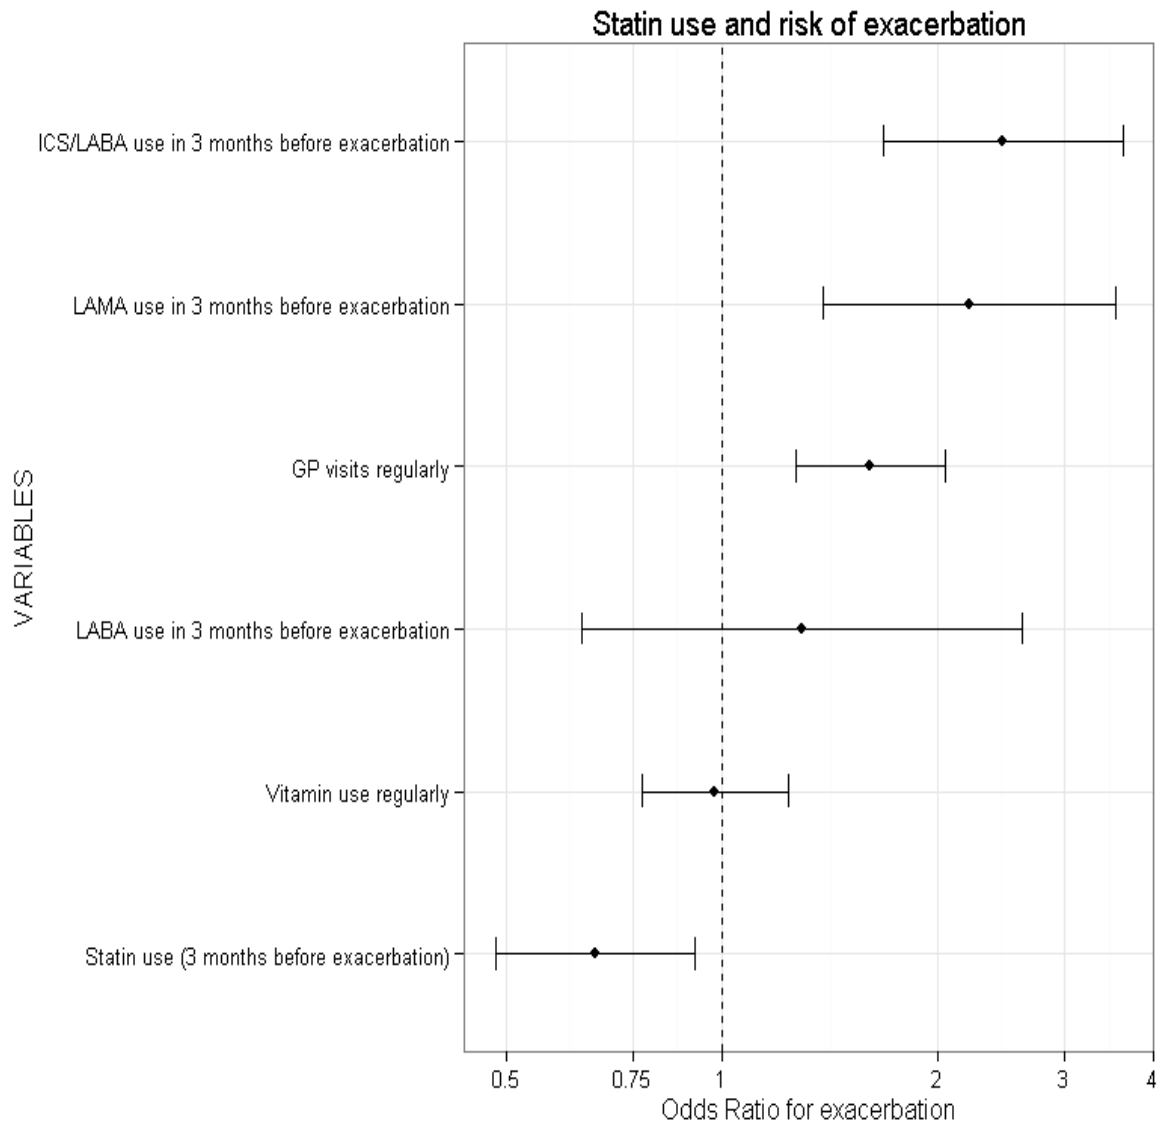

**Suppl Figure 3: STATINS AND CRP.** Variables included as possible confounders in the multivariable logistic regression analysis, and their associated odds of having a high CRP. Abbreviations: GOLD=Global initiative of Obstructive Lung Disease; GP=general practitioner; ICS/LABA= fixeddose combinations of inhaled corticosteroids with long-acting beta<sub>2</sub>-agonists; LABA=long-acting beta<sub>2</sub>-agonists; LAMA=long-acting anti-cholinergics.

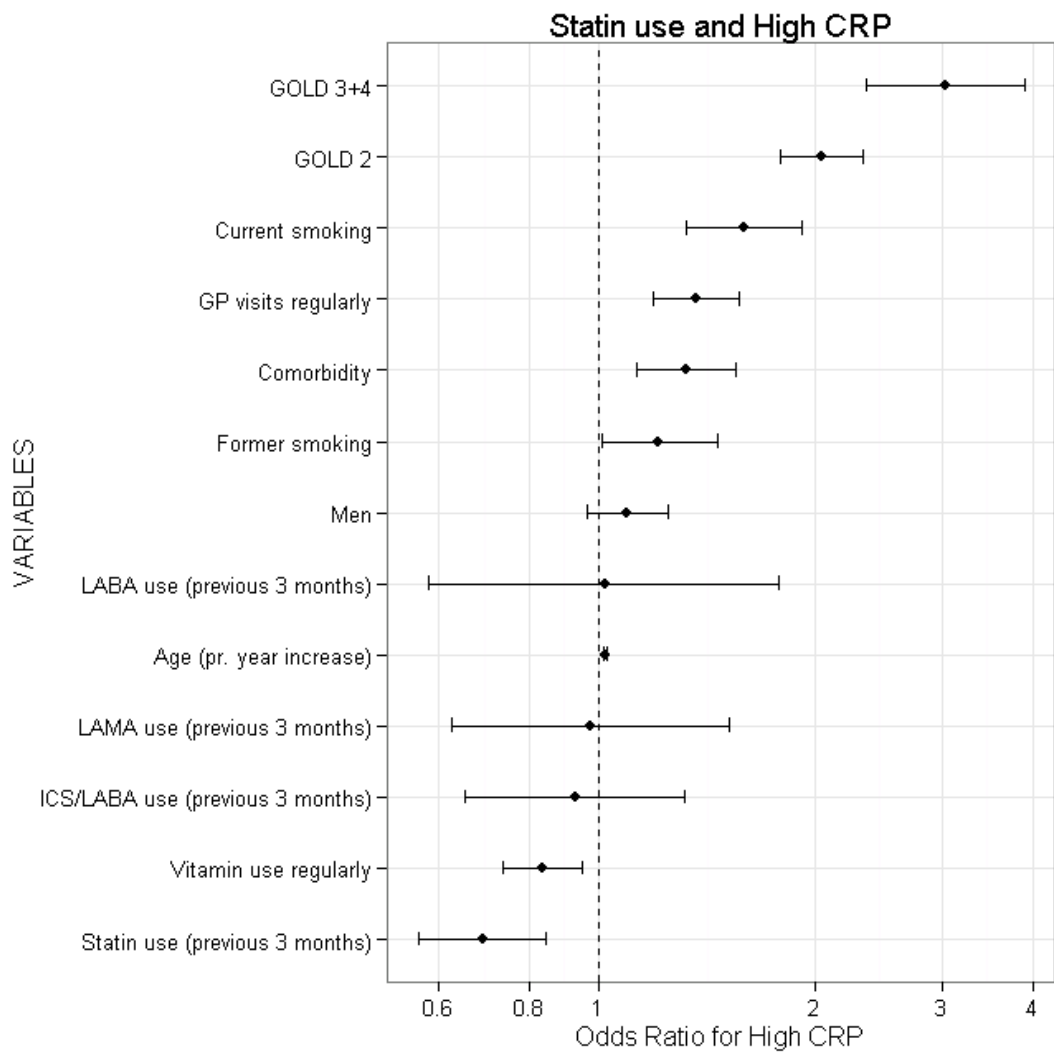

**Suppl Figure 4: POTENTIAL CONFOUNDERS.** Potential measured and unmeasured confounders that could affect the association between statin use and exacerbation.

### Measured potential confounders

- Age
- Gender
- Pulmonary function
- Smoking
- Comorbidity (cardiovascular)
- Pulmonary medications
- Health behaviour (visits to the general practitioner (GP) and regular use of vitamins)
- CRP (C-reactive protein)
- Socio-economic status (school education and household income)
- Frailty: markers of psychological distress
- Alcohol consumption categories
- Exacerbations: admissions and treatment with systemic corticosteroids

### Unmeasured potential confounders

- Lipid levels
- Medications (others than statins and pulmonary)
- Comorbidity (non cardiovascular)
- Markers of systemic inflammation (not CRP)
- Health behaviour: (not GP visits and vitamin use)
- Frailty: not markers of psychological distress
- Others

**STATIN USE**

**EXACERBATION**

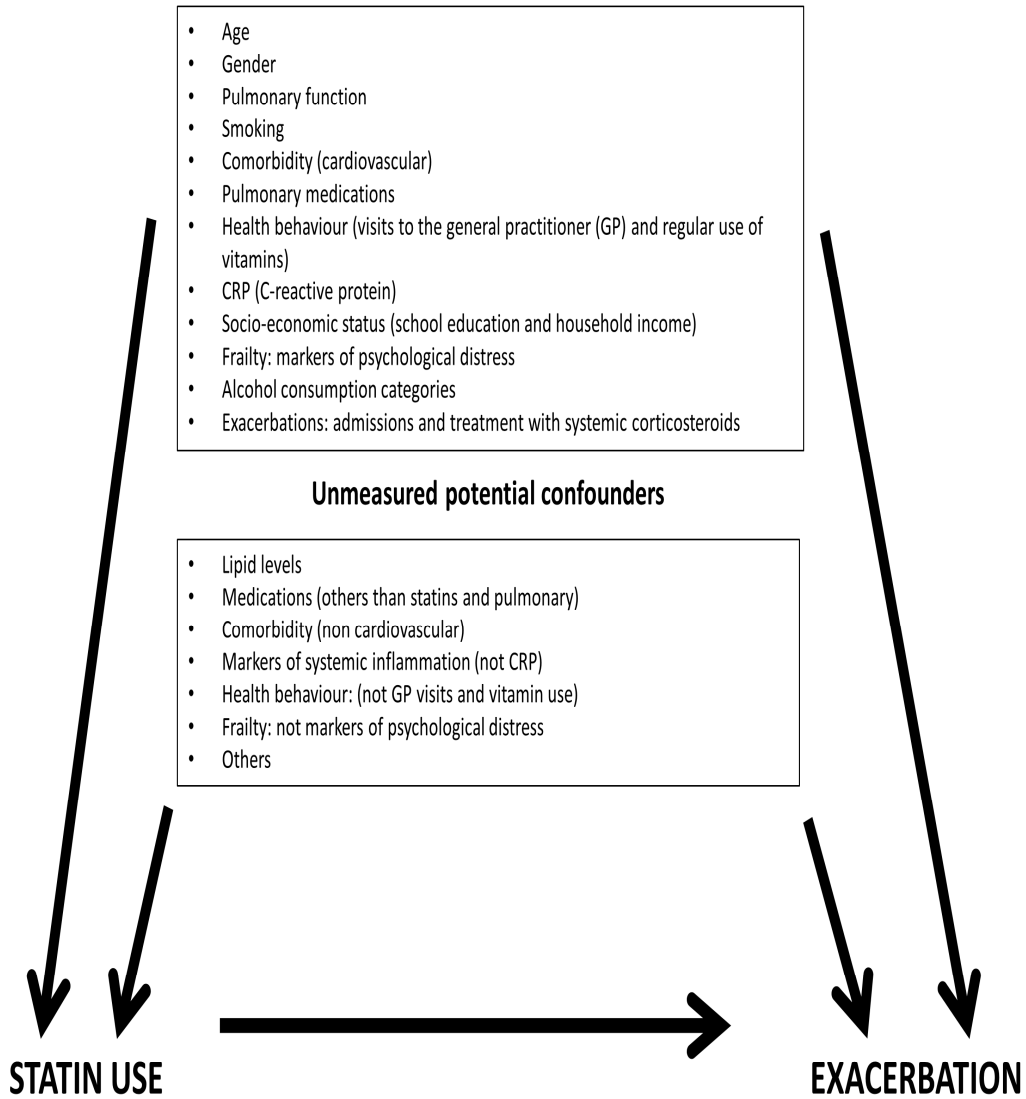

Supplement: thoraxjnl-2014-205795supp_figures.pdf [file thoraxjnl-2014-205795supp_figures.pdf]
