# Supplementary material for: Statin use and exacerbations in individuals with chronic obstructive pulmonary disease
Source: HighWire-hosted journal article supplement (doi:10.1136/thoraxjnl-2014-205795), 2014-10-27
Supplement: thoraxjnl-2014-205795supp.pdf [file thoraxjnl-2014-205795supp.pdf]

## ONLINE ONLY SUPPLEMENTARY MATERIAL

Statin Use and Exacerbations in Individuals With

Chronic Obstructive Pulmonary Disease

Truls S. Ingebrigtsen, MD, Jacob L. Marott, M.Sc. (Statistician), Børge G. Nordestgaard, MD, D.M.Sc., Peter Lange, MD, D.M.Sc., Jesper Hallas, MD, D.M.Sc., and Jørgen Vestbo, MD, D.M.Sc.

**e-Table 1.** Shows details of variables from the Copenhagen General Population Study (2003-2008). These variables were included either as matching variables in the case-control design, and/or as possible confounders in multivariable analyses.

| MATCHING VARIABLES                                                                                                                                                                                                                                                                                                                                                                                                                                                                                                                                                                                                                                                                                                                                                                                                                                                                                                                                                                                                                                                                                                                                                                                                                                                                                                                                                                                                                                                                                                               | OTHER POSSIBLE CONFOUNDERS                                                                                                                                                                                                                                                                                                                                                                                                                                                                                                                                                                                                                                                                                                                                                                                                                                                                                                                                                                                                                                                                                                                                                                                                                                                                                                                                                                                                                                                                                                                                                                                                                                                                                                                                                                                                                                                                                                                                                                                                                                                                                                                                                                                                                                                                                                                                                                                                                                                                                                                                                  |
|----------------------------------------------------------------------------------------------------------------------------------------------------------------------------------------------------------------------------------------------------------------------------------------------------------------------------------------------------------------------------------------------------------------------------------------------------------------------------------------------------------------------------------------------------------------------------------------------------------------------------------------------------------------------------------------------------------------------------------------------------------------------------------------------------------------------------------------------------------------------------------------------------------------------------------------------------------------------------------------------------------------------------------------------------------------------------------------------------------------------------------------------------------------------------------------------------------------------------------------------------------------------------------------------------------------------------------------------------------------------------------------------------------------------------------------------------------------------------------------------------------------------------------|-----------------------------------------------------------------------------------------------------------------------------------------------------------------------------------------------------------------------------------------------------------------------------------------------------------------------------------------------------------------------------------------------------------------------------------------------------------------------------------------------------------------------------------------------------------------------------------------------------------------------------------------------------------------------------------------------------------------------------------------------------------------------------------------------------------------------------------------------------------------------------------------------------------------------------------------------------------------------------------------------------------------------------------------------------------------------------------------------------------------------------------------------------------------------------------------------------------------------------------------------------------------------------------------------------------------------------------------------------------------------------------------------------------------------------------------------------------------------------------------------------------------------------------------------------------------------------------------------------------------------------------------------------------------------------------------------------------------------------------------------------------------------------------------------------------------------------------------------------------------------------------------------------------------------------------------------------------------------------------------------------------------------------------------------------------------------------------------------------------------------------------------------------------------------------------------------------------------------------------------------------------------------------------------------------------------------------------------------------------------------------------------------------------------------------------------------------------------------------------------------------------------------------------------------------------------------------|
| <ul style="list-style-type: none"> <li>• AGE: in years <math>\pm</math> 5 years.</li> <li>• GENDER: man or woman.</li> <li>• PULMONARY FUNCTION TESTS: according to the Global initiative for Obstructive Lung Disease (GOLD) grade of airflow limitation:               <ol style="list-style-type: none"> <li>1. GOLD 1: forced expiratory volume in one second (<math>FEV_1</math>) <math>\geq</math> 80 percent of predicted (% predicted) based on internal reference equations from asymptomatic never smokers.</li> <li>2. GOLD 2: 50% predicted <math>\leq</math> <math>FEV_1</math> &lt; 80 % predicted.</li> <li>3. GOLD 3+4: <math>FEV_1</math> &lt; 50 % predicted.</li> </ol> </li> <li>• SMOKING: reported never, former or current smoker at the examination.</li> <li>• CARDIOVASCULAR COMORBIDITY: yes/no variable. Defined by at least one of 4 criteria:               <ol style="list-style-type: none"> <li>1. Ischaemic heart disease: a discharge diagnosis of ischaemic heart disease:                   <ol style="list-style-type: none"> <li>a) ICD-8: 410-414</li> <li>b) ICS-10: I20-I25</li> </ol> </li> <li>2. Diabetes mellitus: a discharge diagnosis of diabetes mellitus:                   <ol style="list-style-type: none"> <li>a) ICD-8: 249-250</li> <li>b) ICD-10: E10-E11 or E13-E14.</li> </ol> </li> <li>3. Cerebrovascular disease: reported cerebrovascular disease.</li> <li>4. Regular use of diuretics: reported daily or almost daily use of diuretics.</li> </ol> </li> </ul> | <ul style="list-style-type: none"> <li>• CRP:               <ol style="list-style-type: none"> <li>1. High: CRP &gt; 3 mg/L</li> <li>2. Low: CRP <math>\leq</math> 3 mg/L</li> <li>3. Intermediate: 1 mg/l <math>\square</math> CRP <math>\leq</math> 3 mg/L</li> <li>4. Very low: CRP <math>\leq</math> 1 mg/L</li> </ol> </li> <li>• STATIN USE: at least one physically retrieved dispensing of statins in the three months before the exacerbation date= index date in the case-control design, or in three months before measurement of CRP.</li> <li>• DOSE OF STATINS: calculated in the three months described above and divided into low or high dose by a cut-point of 50% of defined daily dosages.</li> <li>• USE OF ALL MAINTENANCE PULMONARY MEDICATIONS: Three groups:               <ol style="list-style-type: none"> <li>1. Long-acting <math>\beta_2</math>-agonists</li> <li>2. Long-acting anti-cholinergics</li> <li>3. Fixed-dose combinations of inhaled corticosteroids with long-acting <math>\beta_2</math>-agonists</li> </ol> </li> <li>• DOSE OF ALL MAINTENANCE PULMONARY MEDICATIONS: calculated as described for 'DOSE OF STATINS', for three groups:               <ol style="list-style-type: none"> <li>1. Dose of long-acting <math>\beta_2</math>-agonists</li> <li>2. Dose of long-acting anti-cholinergics</li> <li>3. Dose of fixed-dose combinations of inhaled corticosteroids with long-acting <math>\beta_2</math>-agonists</li> </ol> </li> <li>• HEALTH BEHAVIOUR:               <ol style="list-style-type: none"> <li>1. Regular use of vitamin pills: reported daily or almost daily use of vitamin pills, or:</li> <li>2. Regular visits to their general practitioner: reported number of visits to their general practitioner larger than three times per year.</li> </ol> </li> <li>• SOCIOECONOMIC STATUS:               <ol style="list-style-type: none"> <li>1. Education: length of reported school education: &lt;8 years/8-10 years/&gt;10 years/&gt;10 years+university. These categories correspond to lower primary school, higher primary school and secondary school, college, and university in Denmark.</li> <li>2. Household income: low/intermediate/high, defined by categories of reported household income in Danish kroner.</li> </ol> </li> <li>• ALCOHOL CONSUMPTION CATEGORIES: reported alcohol consumption categories: daily/weekly or monthly/none.</li> <li>• FRAILTY: reporting the feeling of not having accomplished very much recently or reporting a feeling of giving up.</li> </ul> |

**e-Table 2.** Anatomic Therapeutic Chemical codes used to identify dispensed medications.

| DISPENSED MEDICATIONS                                                                           | ANATOMIC THERAPEUTICAL CHEMICAL CODES |
|-------------------------------------------------------------------------------------------------|---------------------------------------|
| Statins                                                                                         | C10                                   |
| Long-acting beta <sub>2</sub> -agonists                                                         | R03AC02 R03AC03 R03CC12 R03CC13       |
| Long-acting anti-cholinergics                                                                   | R03BB04                               |
| Fixed-dose combinations of inhaled corticosteroids with long-acting beta <sub>2</sub> -agonists | R03AK06 R03AK07                       |
| Oral corticosteroids                                                                            | H02AB6 H02AB7                         |
| Antibiotics                                                                                     | J01                                   |

**e-Table 3.** Characteristics of variables in the Copenhagen General Population Study.

| VARIABLES                                           | COPD<br>N=5,794     |                      | Missing data - % (N)<br>(COPD) | 1:2 matched case-control study<br>N=1,546 |                     | Missing data - % (N)<br>(case-control study) |
|-----------------------------------------------------|---------------------|----------------------|--------------------------------|-------------------------------------------|---------------------|----------------------------------------------|
|                                                     | Statin use<br>N=700 | No statin<br>N=5,094 |                                | Statin use<br>N=320                       | No statin<br>N=1226 |                                              |
| CRP high (>3 mg/L) - % (No.)                        | 27.3 (191)          | 28.7 (1464)          | 0 (0)                          | 34.4 (110)                                | 40.0 (489)          | 0.2 (3)                                      |
| Age – mean (SD)                                     | 70.6 (8.4)          | 65.6 (11.8)          | 0 (0)                          | 73.1 (7.5)                                | 70.1 (9.9)          | Not relevant<br>(selection criteria)         |
| Men - % (No.)                                       | 53.3 (373)          | 46.5 (2368)          | 0 (0)                          | 58.4 (187)                                | 45.2 (554)          |                                              |
| FEV <sub>1</sub> % of predicted – mean (SD)         | 79.2 (19.4)         | 80.3 (19.4)          | 0 (0)                          | 69.5 (21.2)                               | 69.3 (21.9)         |                                              |
| Comorbidity <sup>a</sup> - % (No.)                  | 62.6 (438)          | 18.2 (928)           | 0 (0)                          | 66.2 (212)                                | 30.2 (370)          |                                              |
| Ischaemic heart disease - % (No.)                   | 36.9 (258)          | 5.9 (301)            | 0 (0)                          | 42.8 (137)                                | 12.3 (151)          |                                              |
| Cerebrovascular disease - % (No.)                   | 14.4 (100)          | 3.7 (188)            | 0.3 (19)                       | 11.6 (37)                                 | 5.2 (63)            |                                              |
| Diabetes mellitus - % (No.)                         | 12.1 (85)           | 1.3 (68)             | 0 (0)                          | 11.2 (36)                                 | 3.3 (40)            |                                              |
| Regular use of diuretics - % (No.)                  | 27.1 (180)          | 11.3 (560)           | 2.9 (170)                      | 37.1 (115)                                | 19.6 (233)          |                                              |
| Current smoking - % (No.)                           | 31.3 (213)          | 39.6 (1944)          | 3.5 (203)                      | 32.2 (103)                                | 43.7 (536)          |                                              |
| Former smoking - % (No.)                            | 52.1 (355)          | 39.9 (1957)          |                                | 57.8 (185)                                | 44.7 (548)          |                                              |
| GP visits regularly <sup>b</sup> - % (No.)          | 55.3 (373)          | 29.2 (1453)          | 2.6 (148)                      | 54.9 (169)                                | 40.2 (476)          | 3.6 (55)                                     |
| Regular use of vitamin pills <sup>c</sup> - % (No.) | 53.3 (355)          | 53.0 (2628)          | 3.0 (173)                      | 52.0 (158)                                | 57.8 (690)          | 3.2 (49)                                     |
| Maintenance medications <sup>d</sup> - % (No.)      | 5.6 (39)            | 5.0 (253)            | 0 (0)                          | 16.9 (54)                                 | 17.4 (213)          | 0 (0)                                        |
| Long-acting beta <sub>2</sub> -agonists - % (No.)   | 0.9 (6)             | 1.1 (54)             | 0 (0)                          | 3.1 (10)                                  | 2.5 (31)            | 0 (0)                                        |
| Long-acting anti-cholinergics - % (No.)             | 2.0 (14)            | 1.9 (98)             | 0 (0)                          | 7.2 (23)                                  | 7.6 (93)            | 0 (0)                                        |
| Fixed-dose combinations - % (No.)                   | 3.6 (25)            | 3.3 (170)            | 0 (0)                          | 10.6 (34)                                 | 11.4 (140)          | 0 (0)                                        |

COPD = Chronic Obstructive Pulmonary Disease; CRP = C-reactive protein; FEV<sub>1</sub> = Forced Expiratory Volume in one second; GP = general practitioner. <sup>a</sup>Composite (yes/no) constructed from at least one of the following criteria: a discharge diagnosis of ischaemic heart disease and/or diabetes mellitus, and/or reported cerebrovascular disease, and/or reported daily or almost daily use of diuretics. <sup>b</sup>Reports visiting their general practitioner more than three times in the year before the examination. <sup>c</sup>Reports a daily or almost daily use of vitamin pills. <sup>d</sup>Use of long-acting beta<sub>2</sub>-agonists, and/or long-acting anti-cholinergics, and/or fixed-dose combinations of inhaled corticosteroids with long-acting beta<sub>2</sub>-agonists in the three months before the examination, or in the three months before the index date in the case-control study.
